# Supplementary material for: In situ Sr–Nd isotope analysis of vesuvianite by LA-MC-ICP-MS: methodology and application
Source: Royal Society of Chemistry journal article supplement (doi:10.1039/d3ja00440f), 2024-01-01
Supplement: d3ja00440f1.pdf [file d3ja00440f1.pdf]

### Supporting Information

**Table S1** Trace element compositions of the vesuvianite samples measured by LA-ICP-MS.

**Table S2** Individual *in situ* Sr isotopic data of vesuvianite samples obtained by LA-MC-ICP-MS.

**Table S3** Individual *in situ* Sm-Nd isotopic data of vesuvianite samples obtained by LA-MC-ICP-MS.
