# Supplementary material for: In situ Sr–Nd isotope analysis of vesuvianite by LA-MC-ICP-MS: methodology and application
Source: Royal Society of Chemistry journal article supplement (doi:10.1039/d3ja00440f), 2024-01-01
Supplement: d3ja00440f4.pdf [file d3ja00440f4.pdf]

|                      |                    |      |      |      |      |      |      |      |      |     |     |      |      |      |      |      |      |      |      |      |      |      |      |      |      |
|----------------------|--------------------|------|------|------|------|------|------|------|------|-----|-----|------|------|------|------|------|------|------|------|------|------|------|------|------|------|
| Ta                   | μg g <sup>-1</sup> | 3.4  | 3.0  | 1.7  | 0.2  | 1.7  | 0.2  | 2.7  | 8.5  | 2.4 | 3.6 | 17   | 16   | 5.6  | 6.5  | 4.5  | 11.1 | 0.05 | 0.02 | 0.08 | 0.09 | 0.33 | 0.30 | 1.5  | 0.4  |
| W                    | μg g <sup>-1</sup> | 0.17 | 0.19 | 0.39 | 0.49 | 0.14 | 0.11 | 0.63 | 1.46 | 0.5 | 1.4 | 0.26 | 0.72 | 0.06 | 0.05 | 0.40 | 0.99 | 0.23 | 0.20 | 0.11 | 0.19 | 0.16 | 0.16 | 0.13 | 0.17 |
| Pb                   | μg g <sup>-1</sup> | 4.3  | 2.3  | 5.1  | 1.1  | 4.6  | 1.3  | 2.4  | 1.2  | 2.4 | 1.2 | 2.1  | 1.0  | 4.8  | 1.6  | 1.3  | 4.4  | 3.2  | 0.9  | 1.5  | 0.7  | 3.4  | 2.0  | 4.2  | 1.1  |
| Pb*                  | μg g <sup>-1</sup> | 17   | 4    | 10.7 | 2.0  | 12   | 3    | 6.4  | 3.8  | 6.7 | 3.7 | 4.4  | 3.2  | 5.0  | 1.5  | 1.1  | 4.6  | 4.2  | 1.4  | 0.60 | 0.50 | 3.9  | 1.8  | 4.2  | 0.8  |
| Th                   | μg g <sup>-1</sup> | 267  | 163  | 162  | 171  | 118  | 15   | 38   | 81   | 44  | 107 | 16   | 38   | 0.1  | 0.2  | 14   | 62   | 80   | 141  | 2.0  | 11.2 | 15   | 29   | 2.3  | 2.3  |
| U                    | μg g <sup>-1</sup> | 270  | 78   | 105  | 21   | 169  | 18   | 151  | 131  | 140 | 108 | 77   | 109  | 0.8  | 1.1  | 8.8  | 11.3 | 97   | 133  | 13   | 11   | 12   | 10   | 2.2  | 1.5  |
| (La/Lu) <sub>N</sub> |                    | 5414 | 1466 | 1372 | 904  | 2220 | 824  | 345  | 458  | 269 | 131 | 5.2  | 5.4  | 1.7  | 1.6  | 20   | 25   | 119  | 221  | 228  | 166  | 11   | 10   | 13   | 7    |
| Eu/Eu*               |                    | 1.0  | 0.1  | 0.95 | 0.04 | 1.0  | 0.1  | 1.8  | 3.8  | 1.6 | 2.4 | 0.49 | 0.76 | 2.2  | 0.7  | 1.1  | 1.2  | 1.2  | 0.5  | 3.4  | 7.2  | 0.80 | 0.59 | 1.3  | 0.3  |

- (La/Lu)<sub>N</sub> was normalized to chondrite after McDonough and Sun;<sup>67</sup>  $Eu/Eu^* = \frac{Eu_N}{\sqrt{(Sm_N \times Gd_N)}}$  was normalized to chondrite after McDonough and Sun.<sup>67</sup>

-Pb\* (μg g<sup>-1</sup>) = 23.6%\*<sup>206</sup>Pb (μg g<sup>-1</sup>) + 22.6%\*<sup>207</sup>Pb (μg g<sup>-1</sup>) + 52.3%\*<sup>208</sup>Pb (μg g<sup>-1</sup>).
